# Supplementary material
Source: ML conference proceedings conference paper supplement (https://openaccess.thecvf.com/content/ICCV2021/html/Zhang_Object_Tracking_by_ICCV_2021_paper.html)
Supplement: Supplementary file 2 [file Zhang_Object_Tracking_by_ICCV_2021_supplemental.zip]

Archive with 2 entries (2 files):
- 08103-supp.mp4
- 08103-supp.pdf
